# Supplementary material
Source: publisher figshare collection journal article supplement (https://geolsoc.figshare.com/ndownloader/files/26181422)
Supplement: Supplementary file 1 [file 26181422]

## Sheet: Sheet1
AFR-DZ		ANT-DZ		SAM-DZ
2032	-8.763	505	1.065	1260	6.894
1029	-16.177	505	2.321	1359	-0.988
288	-2.996	505	0.09	1423	6.081
1059	-0.136	505	1.896	953	0.833
1237	4.992	505	1.136	1414	4.63
278	2.689	505	1.1	1373	-0.685
1031	-13.241	1176	7.155	1332	4.137
424	-1.31	1176	8.176	1829	1.356
282	2.776	1176	7.474	1515	-0.288
1062	-5.366	1176	8.247	1852	2.489
518	-7.302	1176	8.325	1359	-0.884
1058	-14.316	1176	9.566	1204	-2.289
2674	1.239	1176	7.467	643	-9.621
1091	-0.947	1176	7.609	533	5.142
2636	-2.319	379	-6.882	637	-24.201
1069	7.092	381	-10.805	1905	-5.603
1046	3.037	475	-2.198	640	-16.869
636	-27.853	521	-0.214	1233	-3.291
307	0.704	526	-17.002	1238	2.347
1129	-5.244	550	-12.829	1086	3.358
991	7.202	552	-1.857	1593	4.832
2042	-7.961	562	0.821	1261	4.431
525	-4.335	563	-15.394	631	-8.577
566	-16.059	564	-6.039	564	-14.922
700	-11.962	573	-32.6	1875	-2.423
2639	3.224	575	-28.549	1265	-1.065
507	-3.359	577	-5.072	682	-11.196
2645	-0.677	581	-12.242	528	-7.481
1902	-4.745	582	-7.691	1294	2.29
2038	-4.756	582	-11.796	598	-18.783
608	-5.795	594	-17.809	1918	0.857
470	0.916	596	-7.667	948	-14.999
1020	1.715	597	-10.981	1163	1.818
722	7.404	599	-3.218	1379	4.753
265	-1.52	599	-3.722	1429	5.102
550	2.294	604	1.351	1015	5.298
912	0.32	608	-42.26	1042	2.151
699	-5.663	613	-3.023	1950	1.499
2398	-1.773	615	-26.387	608	-7.25
2188	-5.176	615	-6.556	548	0.601
882	-9.774	619	1.909	1805	-4.434
1078	-6.912	621	-0.88	1896	-14.252
559	-5.232	622	-0.35	1594	2.113
1048	2.092	626	5.685	1571	4.012
315	-2.29	637	-19.221	1031	3.48
1129	5.874	645	-17.562	1799	2.488
1014	-12.683	672	-20.062	1065	3.572
260	-3.284	696	-2.725	1433	1.357
259	-6.361	699	-5.607	1090	5.327
627	-5.34	700	-4.666	1417	2.433
275	-1.569	793	-10.332	1738	1.971
2062	-4.01	798	-27.267	1411	0.748
1055	-14.318	839	-6.932	988	-8.687
562	-4.784	879	-5.625	1565	4.706
718	-9.571	885	-9.515	1580	1.79
2032	-6.537	925	-2.321	1032	3.129
247	5.664	1056	-4.706	1559	2.277
1808	-3.469	1099	2.039	987	-3.485
578	-22.035	1168	-8.941	1682	2.528
1111	-12.525	1196	1.153	1056	1.903
2802	0.084	1500	-16.964	1271	4.196
1992	-2.282	1699	-22.842	968	0.769
287	-2.93	1811	-25.461	1688	0.533
250	-0.455	1828	-0.145	1518	0.409
253	-6.536	2282	-7.463	1215	4.426
1037	1.501	2429	3.978	1540	-1.014
2143	-3.466	2691	-2.487	1511	0.455
2538	0.488	2700	-10.468	1351	0.375
1914	-1.737	2893	-4.698	1546	1.633
2000	3.092	493	-1.248	1765	0.819
603	7.283	497	-7.712	1668	2.284
273	-1.266	519	-3.522	1467	-0.342
628	-7.53	534	1.156	1545	-0.504
2007	-14.232	534	0.341	1975	-3.631
698	6.882	535	0.364	1487	-0.635
2031	-1.737	549	-8.719	1015	2.156
261	-5.562	551	-1.972	1153	1.653
2414	-3.644	557	-12.745	1414	4.203
571	1.09	558	-18.228	1518	4.656
708	-6.688	565	0.618	1111	-0.435
1145	-5.537	566	-2.441	930	1.37
533	-3.462	568	-3.814	903	1.128
1092	5.745	570	-6.25	1553	-0.309
2001	-7.791	573	-1.803	1107	5.236
2681	-4.525	584	0.638	1584	7.484
832	-2.082	588	-25.798	942	1.794
483	1.121	592	-6.666	1322	3.041
1865	-7.511	599	-8.884	903	0.463
1896	-14.403	600	0.708	1340	-2.377
850	-2.159	609	0.007	1382	2.729
570	-9.56	638	2.757	926	-0.317
290	-2.532	647	-15.222	1517	6.776
1182	-4.383	651	0.318	636	-3.563
1132	-16.008	669	2.115	1033	0.943
1064	-13.816	721	1.784	1198	2.415
2543	-5.408	1045	12.668	1292	0.64
614	3.04	1093	4.284	1984	-3.315
1047	-3.005	1098	5.775	1193	2.617
1112	-2.476	1108	10.179	928	2.012
286	-4.778	1117	12.962	1238	5.291
746	-6.503	1229	6.901	945	2.339
1171	-10.113	1461	8.258	1235	1.519
1048	-14.146	1676	6.273	1391	1.766
480	-4.494	1771	-2.078	983	2.101
612	-17.02	1810	0.487	1053	3.509
801	-9.439	2736	-7.062	1165	2.243
1370	0.957	2753	-5.647	908	-1.896
1992	-10.695	2795	-7.086	1278	0.493
1079	-5.506	3141	-0.116	1490	4.049
1008	-18.937	518	-6.624	937	1.95
1836	-7.084	538	-3.078	1556	2.715
1271	1.93	553	-0.915	1367	1.345
598	-28.147	583	-5.828	1529	3.206
1109	-0.462	589	0.249	1074	5.137
1231	1.904	589	-0.846	1486	3.482
1874	-4.115	607	-3.987	1049	1.167
2663	0.428	609	-7.217	1542	-1.483
1045	-2.7	630	0.46	1372	2.334
1116	-8.925	634	-3.527	1675	6.344
483	-18.002	647	-1.512	1211	2.995
1109	2.26	681	0.688	1561	0.528
1880	-4.14	728	-0.827	1662	5.402
887	-0.508	760	-1.539	943	-0.298
2941	-5.742	837	5.674	1606	11.09
517	-5.037	852	1.18	1079	4.782
2054	-1.938	861	-2.601	1571	2.124
418	-2.248	971	-1.026	1602	1.144
1043	-7.377	1021	3.923	1315	1.297
523	0.411	1026	4.457	1184	1.873
510	-5.525	1034	-2.883	1818	4.758
851	2.829	1045	5.058	1162	1.584
377	-3.86	1052	3.409	1140	1.535
780	-5.824	1067	5.132	1573	3.602
685	-4.625	1070	4.48	1535	1.369
555	2.285	1097	4.654	1377	-3.712
2471	-3.07	1108	7.375	1028	-1.017
587	-27.57	1115	8.094	1585	3.254
1933	-8.998	1347	-3.581	1752	-5.884
644	-3.288	1421	2.832	1504	4.556
1328	7.39	1463	2.138	1338	1.465
1688	-3.702	1567	10.514	1622	2.472
541	-1.488	1632	2.208	929	-0.209
554	-2.474	1780	4.455	3083	-9.213
626	-13.6	1782	-9.35	1706	1.779
1909	-5.1	2668	-1.546	1308	-1.766
804	-9.392	538	-3.641	1366	-3.287
609	-0.394	542	-4.048	1240	3.838
1898	-13.489	550	-3.765	1187	1.175
2686	0.642	557	-1.041	942	0.639
1127	-11.156	569	6.724	1203	-0.682
1880	-3.77	592	-4.391	1544	-1.205
630	-17.91	597	0.422	1525	0.69
2108	2.571	626	-1.193	1523	3.911
298	6.027	668	3.581	1431	-2.125
2071	-7.194	489	-2.821	1268	2.355
2593	-7.062	494	-1.989	1185	2.912
1894	0.903	510	-3.755	918	0.667
538	-2.25	510	-0.336	1555	2.081
479	0.23	510	3.755	1017	1.376
690	-0.818	510	-6.158	615	-4.349
2570	-1.259	514	-4.927	932	-0.133
2658	1.144	517	-2.527	1161	1.267
770	8.91	517	-4.499	934	-1.443
930	-21.976	517	-3.388	1535	0.631
1029	5.546	518	-1.151	737	-7.856
367	-5.826	518	-4.302	1219	3.896
2072	-2.133	519	-3.371	1767	-5.162
1761	-1.954	519	-2.07	1004	2.463
483	-2.033	529	-2.809	1334	6.176
590	-11.171	542	1.15	942	-1.475
694	-4.163	542	-0.343	1538	1.166
2052	-4.912	546	-2.207	1212	1.617
587	-12.101	550	0.402	1285	3.224
1966	-2.824	636	0.978	1730	4.172
334	-0.124	719	1.688	1198	3.571
1991	-17.58	721	4.669	1245	2.91
379	3.42	816	10.675	1368	3.481
2307	-4.211	874	9.274	949	1.07
2657	-6.531	882	4.699	1498	3.383
485	-0.139	906	2.81	1789	-1.828
663	1.13	1016	6.863	969	-0.001
1960	-6.581	1025	6.551	1916	-2.455
214	-1.454	1032	13.059	1373	1.483
1176	7.868	1039	6.491	948	-0.055
2743	-2.975	1041	9.094	1140	2.388
1304	-4.094	1063	5.152	1096	1.845
3193	-3.231	1065	7.5	1182	4.146
607	-7.318	1065	10.371	1791	-5.115
1583	-12.242	1105	12.167	991	1.073
522	-2.898	616	1.696	941	0.925
178	3.265	712	1.032	1674	1.514
2910	2.776	860	0.142	1249	2.794
1002	-13.344	936	0.9	1488	1.016
2030	-7.135	986	5.603	932	-3.967
678	2.773	995	-19.963	1300	5.878
2026	-5.861	1003	2.579	1217	6.423
2669	-3.385	1016	1.536	1046	-0.252
268	-4.992	1042	0.696	984	2.987
1051	7.154	1044	1.007	1211	1.789
1117	6.734	1045	13.342	1006	0.502
2720	-1.597	1052	2.062	1078	3.303
637	-3.815	1064	7.195	911	2.542
1920	0.72	1064	-1.915	1401	3.059
635	4.264	1068	4.186	651	-7.106
1035	-9.862	1085	8.292	1542	-1.768
285	1.837	1095	1.03	1065	4.777
1039	-11.019	1096	8.342	662	1.245
641	3.015	1134	4.361	1072	-7.568
614	-21.115	595	-24.18	993	-0.208
1906	-5.052	541	-4.465	1207	2.225
588	-13.309	1819	1.631	899	-0.905
572	-6.311	1117	4.421	881	0.252
1873	-1.969	1168	4.931	1155	0.461
931	-17.871	2782	-3.409	962	-1.536
604	-2.875	1023	5.849	1196	3.767
168	-8.427	947	3.062	989	0.742
585	-19.476	770	-0.128	906	-21.934
142	-2.255	1054	9.141	1193	4.741
618	-2.203	551	-4.795	1479	-1.772
925	2.358	1046	3.363	930	0.878
596	-4.036	508	-8.537	1581	1.66
188	-3.678	982	2.637	1863	-1.186
984	-7.751	998	-1.524	1339	2.578
570	-13.104	589	1.157	949	2.898
579	-7.849	567	-1.816	1252	7.32
946	-23.481	568	-5.08	984	2.194
572	-15.481	955	-0.484	1091	2.884
2151	2.498	1868	-3.31	940	-0.222
564	-12.736	525	-4.22	719	-5.608
546	-4.618	1068	3.307	1074	2.117
943	7.787	1062	-4.799	1359	2.188
1940	-2.386	1731	-7.283	970	0.658
560	-21.631	797	0.104	1580	2.025
838	8.718	613	-12.034	1100	4.296
655	1.781	1166	-5.318	1283	3.323
667	6.796	1090	0.998	1212	1.899
622	4.506	1704	-17.053	653	-6.034
1948	-5.634	965	-2.656	1808	-3.622
1997	-6.005	686	-0.596	1196	3.273
563	-5.458	1679	4.136	1271	5.124
1913	-8.317	644	2.48	665	-2.07
698	3.51	570	2.643	1374	7.069
619	-7.05	1749	-3.952	1207	2.151
1960	-18.352	1081	9.841	947	3.368
555	-16.007	550	-4.93	1587	0.634
2147	3.162	2018	-11.708	1799	-4.718
629	-5.562	1721	7.267	657	-17.544
568	-15.835	1788	-1.772	923	0.008
565	-13.752	576	-5.973	1300	6.319
548	0.085	1402	4.858	1655	7.302
584	-2.58	515	-5.517	1818	-5.064
575	-2.671	699	8.943	950	3.005
925	1.578	607	1.204	995	2.396
972	-10.825	799	5.942	1103	1.946
637	3.66	2740	-5.451	319	-3.05
155	-6.748	1049	8.052	340	1.387
579	-6.884	1864	-2.014	297	0.123
2451	1.934	1031	1.806	311	-0.37
647	-8.792	937	-11.364	290	0.64
573	6.221	2565	-3.272	323	3.624
707	7.794	1455	4.617	336	2.896
921	-19.673	525	-6.582	315	2.587
755	9.648	1151	6.336	326	3.331
2583	-12.348	480	5.4	326	2.647
647	5.399	435	-13.103	302	0.049
750	6.115	2830	-5.618	305	0.019
653	-3.943	585	-0.935	289	-1.187
549	-27.827	570	-3.106	299	-0.607
801	7.122	1066	6.419	1081	7.155
850	-0.118	1802	-5.168	1175	9.193
741	10.557	711	-3.179	1095	8.822
565	-30.161	711	3.226	1145	9.621
611	6.924	574	-1.686	1893	-11.349
550	-16.311	1057	1.966	1413	4.309
772	7.188	2019	-6.97	1353	-6.035
1070	7.585	1100	4.959	1388	-2.393
726	11.902	1022	2.685	1364	5.292
2269	-6.521	557	-2.289	1229	6.811
598	4.935	551	-5.874	1098	9.013
616	-0.312	953	0.309	1119	7.397
2667	-6.166	765	-2.132	1020	4.996
689	7.944	1763	-5.455	1402	7.041
1930	-6.063	2640	-0.674	1073	0.965
656	-10.42	1726	1.26	1261	7.861
618	-11.338	1028	5.915	1095	7.929
635	4.877	557	0.716	1106	8.241
609	6.697	1115	6.591	1072	5.715
851	8.619	599	5.059	1235	3.141
727	7.45	1816	-6.051	1091	6.699
616	-5.99	541	-1.301	469	-4.182
2485	-10.932	488	-1.095	525	-4.048
618	0.852	622	1.156	470	-4.8
698	5.954	564	-12.93	443	2.693
667	5.365	979	8.1	335	-3.063
588	-24.577	3034	-6.486	339	-1.803
540	-6.361	1027	8.401	334	-3.17
1027	-0.913	527	-1.186	308	-2.54
2328	-12.665	1746	2.914	335	0.299
146	6.7	878	0.644	331	4.06
559	4.007	1040	7.123	574	0.566
2121	0.266	1775	-1.735	547	-0.28
523	-6.087	1254	7.718	569	3.37
912	-15.798	812	-6.103	596	-0.423
629	-10.15	1072	-10.895	662	3.681
1952	-16.622	1077	-0.942	872	-7.723
617	-10.186	1087	6.563	1095	-6.606
202	7.13	1092	-2.816	1184	3.772
628	-8.024	1115	3.744	1053	-3.015
123	3.079	1120	-10.106	1075	6.278
667	7.641	1155	-16.368	965	5.844
763	4.1	1156	4.203	414	-1.909
812	7.371	1163	-9.177	2953	-3.717
1000	-6.752	1175	-2.774	3201	0.554
673	6.415	1239	-10.177	1877	-2.263
802	7.01	1245	5.641	421	-0.506
2566	-4.444	1295	-13.325	438	-4.448
997	-2.727	1532	-9.114	1228	5.853
2668	-1.366	1600	-4.353	415	-6.391
301	0.089	1824	-0.572	445	-5.726
703	7.617	850.1	-18.072	545	-3.887
1034	-4.965	906.7	-17.001	946	-5.231
1931	-11.573	923.7	-18.525	616	-3.563
619	-6.27	925.3	-15.838	647	1.977
647	-15.056	939.6	-16.115	561	-0.469
626	7.597	947.8	-15.444	523	-4.284
830	8.32	948.5	-16.775	1013	5.762
936	6.825	960.2	-16.562	1014.5	3.863
991	-1.991	1025.1	-14.309	1228	8.038
731	12.979	1619.8	-1.66	1055	5.555
947	-24.833	1140.8	-12.145	776	1.677
697	9.565	657	1.37	1066	6.542
804	9.525	1110	8.73	1269	7.003
659	-11.757	976	5.3	1287	0.438
803	8.547	649	3.894	1389.4	9.419
735	5.571	515	1.528	904.6	-6.339
1036	-4.163	651	-1.123	789	-4.544
522	-9.514	545	1.756	875.8	1.026
725	11.218	1074	8.195	2483	-1.015
1001	-8.058	500	-0.677	1173	7.099
678	-15.278	1019	5.665	1031	-4.037
1022	6.938	973	5.733	20	-11.206
954	2.686	556	2.636	24	-2.741
593	-7.907	537	1.317	1342	3.575
514	-4.098	492	-3.88	61	-22.458
742	7.738	511	0.107	14	-27.533
718	4.691	996	5.246	29	-3.477
697	8.103	560	1.641	2544	-14.307
746	0.547	511	0.587	1494	1.668
711	11.066	509	1.332	3073	-0.845
1974	-14.665	819	1.94	63	-10.517
625	6.515	510	1.308	1617	-7.661
1884	-4.415	1071	5.973	2376	1.358
2019	-5.094	529	0.745	980	0.639
753	9.894	650	4.305	1383	3.359
691	9.804	530	0.329	1545	-4.455
601	-23.747	624	3.812	243	-8.363
1996	-5.16	698	-1.163	1032	3.884
2629	-10.439	620	4.137	1841	5.198
2494	-2.94	635	4.721	1321	2.422
666	6.194	1109	-14.959	1451	2.252
1883	-13.052	1074	7.598	1701	7.343
2065	-11.236	1005	8.635	2388	-10.13
816	7.576	934	4.074	1184	1.108
906	8.695	499	-2.447	1300	7.65
612	-8.599	529	1.52	1150	3.356
685	4.277	485	1.383	1482	0.337
600	5.895	911	7.078	35	-34.509
654	-6.903	639	4.716	896	-5.079
686	-5.267	542	2.765	28	-21.753
881	-12.077	493	-1.952	1717	-0.018
1049	3.62	618	1.284	1274	-0.543
825	10.354	522	-0.001	41	-20.901
673	8.615	735	4.368	509	4.096
704	8.535	526	2.469	1455	0.27
652	-4.498	644	3.07	1778	6.99
1914	-10.064	798	7.246	1536	7.944
596	6.585	1032	9.702	1649	5.422
740	-8.781	747	3.61	66	-4.954
1071	-1.541	505	1.927	68	-1.625
1935	-7.622	568	1.841	2618	-7.471
1013	-10.933	614	0.734	160	7.159
593	-4.905	2666	-5.592	9	-6.322
1062	-2.813	956	5.144	1552	3.731
1002	-3.161	998	-1.24	1943	-0.715
688	0.071	680	4.926	1226	1.597
959	1.909	579	3.35	69	0.174
2491	-8.06	908	-2.63	160	7.734
605	-10.109	516	-13.156	2933	3.869
1917	-2.638	1089	-0.163	57	6.037
1942	-6.38	493	-14.639	983	4.025
875	12.177	617	4.252	1458	3.613
881	-9.721	520	-13.14	2596	-3.777
1023	5.207	854	-1.33	2250	-3.492
594	-12.583	510	-18.972	1015	4.959
622	4.294	536	-12.24	1246	3.111
534	-4.195	603	2.54	1096	5.115
613	0.766	1268	5.012	177	-1.811
623	-10.021	600	4.373	20	8.864
589	0.725	684	6.051	511	2.737
702	0.651	1800	-15.343	1558	9.972
1014	-4.693	613	2.035	3186	-3.004
641	-5.869	535	-15.389	1413	1.431
2203	0.795	681	8.466	1078	3.413
2704	-4.365	1864	-3.147	1708	3.634
665	-14.325	595	1.167	1554	4.571
1939	-11.147	914	-10.023	64	0.991
564	0.111	640	5.079	1128	0.925
518	-5.061	443	-9.732	2593	-0.02
664	10.927	2648	-1.455	1648	-11.036
951	-25.356	561	-27.233	100	1.647
2525	-2.396	903	5.04	1333	3.132
852	-5.404	531	-13.381	925	3.438
1029	-3.871	805	3.368	1335	-4
2144	0.832	1056	4.175	266	-0.322
493	-14.541	541	-11.483	1016	7.486
268	-24.625	535	-4.815	2697	1.471
550	2.543	976	5.43	1672	-1.023
646	-5.83	524	-12.309	1160	4.893
1047	0.77	906	6.803	1301	10.899
919	-11.527	547	-10.85	1613	0.785
672	-0.629	2044	-3.663	1291	6.797
278	-2.696	865	-1.315	55	1.253
1990	-6.732	501	-12.568	132	-10.752
586	8.58	717	6.85	173	-4.959
557	-26.609	2790	-1.023	2566	-4.763
653	-3.545	537	-10.311	19	-9.288
620	-5.912	520	-18.998	156	4.864
1889	-5.602	1284	7.812	189	-6.379
603	1.606	527	-25.279	13	-5.733
507	-29.908	1843	-9.087	1406	8.246
978	4.459	546	-12.276	24	7.174
639	-10.018	1008	-12.634	70	-12.732
634	-0.845	2009	-4.128	1686	6.821
2089	-6.126	560	-25.607	2845	-6.807
954	-2.103	551	-10.345	131	-12.292
1000	6.299	3176	-1.324	1214	1.015
1037	3.028	2539	-10.737	1671	0.03
1027	9.417	2680	-4.466	1135	-0.725
1033	5.658	470	-0.755	1663	2.375
952	-7.197	1919	-8.285	1034	4
533	-22.56	541	-11.83	68	-16.833
2765	-3.151	688	-1.477	603	-14.375
616	-18.079	2224	-6.327	384	-9.979
627	1.041	1876	-6.475	1612	0.93
1969	-4.867	1056	-0.407	1755	-4.076
561	-1.782	2032	-6.642	63	-0.677
1024	-5.339	1868	-8.687	10	10.256
783	7.728	1359	6.774	1704	4.724
1010	-11.727	1272	2.303	1617	7.511
560	-1.398	480	-6.024	16	-8.327
1060	11.817	898	3.718	2798	-3.76
539	-1.333	504	-12.104	89	-21.14
552	-6.054	436	-31.623	1468	-6.546
658	-23.27	1128	-21.015	60	-24.122
634	-20.262	243	-18.205	2761	3.317
554	-0.159	2031	-5.197	1450	5.884
582	0.651	2974	-4.21	153	-6.334
1004	-19.541	960	-1.402	1110	-1.21
649	-3.381	525	-13.691	23	7.905
514	-9.011	634	-0.283	418	-11.835
1687	-11.863	510	-10.72	87	-15.245
2063	-4.24	560	-6.947	2659	-8.202
1971	-7.34	710	-10.925	962	0.729
335	2.689	529	-12.615	2414	-10.689
2604	0.84	2880	3.543	564	-15.834
1997	-4.543	400	-9.142	1057	0.431
2515	-1.029	2013	-1.174	1336	8.589
2021	-6.519	735	-27.453	26	-8.16
2628	-0.606	3054	-0.1	1372	6.048
402	-1.616	1129	-2.174	1413	-0.657
1988	-4.006	1466	-1.898	1670	4.125
2715	-1.438	1948	-2.923	1633	5.675
1967	-4.54	2242	-1.555	53	-30.927
1990	-5.901	735	1.687	887	-0.985
2068	-9.375	590	-11.149	76	-33.649
1766	1.957	123	-12.272	3034	3.653
1971	-4.077	2511	-1.378	1628	-4.897
1853	-4.355	1109	-0.499	56	-26.755
2101	3.467	1154	0.644	1550	-1.622
2567	4.919	656	-34.569	1645	0.177
2498	-1.542	619	-22.42	1018	1.564
306	-0.6	503	-9.619	1797	6.135
2728	1.659	552	-1.912	943	0.857
1868	-2.139	1096	7.256	1270	0.143
1991	-1.744	1944	-3.79	1292	3.418
1826	-5.166	1804	-18.605	1600	2.901
1851	0.595	776	5.635	1354	-1.877
528	1.642	1311	-10.059	1301	3.946
2011	-1.172	2121	-6.35	4	-14.38
2322	-14.836	889	8.589	1209	3.904
1880	-4.455	3069	4.45	2726	3.372
2604	-8.483	741	-1.577	2484	-12.18
1869	-9.094	941	0.177	22	-5.688
490	-0.027	818	1.193	2671	-2.117
2695	0.279	2687	1.129	1246	7.996
1954	-4.412	1021	1.033	1739	5.596
270	-4.949	652	3.847	514	-16.24
2051	2.104	932	3.626	2672	-0.494
1275	-7.986	348	-4.961	2797	-8.841
1897	-15.579	944	-1.073	82	-9.017
451	-16.132	579	-1.08	1280	7.211
612	1.172	1726	-6.309	1232	4.131
598	1.421	1822	-2.292	99	-8.345
913	-10.612	2890	-2.078	1014	-2.897
1110	4.236	1928	-17.912	71	-14.07
615	-3.106	1794	-4.186	1025	-8.393
1032	1.617	529	-19.677	748	3.168
1018	3.17	1784	-0.019	807	-5.99
494	-6.916	2009	-4.064	1111	-0.708
998	1.985	562	-13.731	1640	2.145
589	1.48	620	-8.683	1659	-6.345
1000	2.277	516	-43.257	1321	4.159
554	1.625	1725	-9.593	1305	6.593
636	1.325	1866	-1.217	1663	-1.243
486	-15.475	1173	-27.698	1088	-0.098
490	-3.158	791	-4.409	5	-3.643
501	-6.863	599	2.055	266	-0.743
1014	2.337	3263	-1.595	1189	2.153
546	0.358	2605	-5.069	399	-3.869
526	-1.45	485	-13.958	1228	8.63
926	-9.599	2189	-0.593	1768	-3.707
990	-4.179	601	6.691	1380	6.961
1908	-5.487	2747	-5.033	2450	-3.298
993	4.566	1094	7.181	142	-3.398
1924	-5.391	1983	-8.235	1701	7.736
710	-0.198	2661	-3.618	562	-10.93
2603	0.672	2371	-6.624	1430	-5.678
968	5.071	517	-23.923	27	-10.321
483	-9.177	826	7.081	2502	-1.207
1014	0.95	773	4.503	1546	0.684
2927	-0.919	2797	-7.174	483	-2.659
992	1.381	1897	-6.844	76	-13.084
491	-6.331	1725	-10.029	3105	-9.651
949	2.872	862	1.946	21	-4.652
991	3.159	2715	0.644	18	-11.016
1008	1.661	534	-7.66	401	1.698
968	3.189	520	-12.336	1915	-9.287
557	1.148	2744	-2.718	1131	2.552
2043	-3.662	1567	-11.005	77	6.954
970	4.334	2088	-4.778	1681	-3.22
835	-6.547	1657	-8.924	2121	-0.427
951	0.133	908	-0.347	2467	-17.188
586	2.657	775	8.596	1817	1.567
521	-22.751	1278	2.62	89	-13.149
1016	-16.864	3116	3.384	1065	2.894
968	1.149	531	-7.765	177	-2.725
1028	2.36	1942	-10.115	1139	1.922
2006	0.443	508	-11.07	2584	-7.493
1066	3.045	520	-12.01	41	-7.464
600	3.882	1507	11.663	2680	-0.239
612	1.309	713	-24.488	1524	-0.206
481	-17.438	2030	-15.398	74	3.594
1019	-6.781	916	-27.818	1646	6.646
1056	5.569	618	0.18	18	2.044
2645	1.883	471	-21.757	1685	-3.144
806	-12.68	654	4.846	1238	10.066
1035	-13.528	900	-4.731	2244	-15.47
1074	-8.644	522	-25.305	2744	-0.967
1053	4.162	2558	0.976	1637	-0.438
819	2.793	2785	-0.604	1274	1.945
587	3.218	1125	-15.391	1643	5.396
776	6.2	2717	-3.424	1511	-16.709
804	-11.699	904	-3.152	1470	4.826
553	6.523	1118	1.597	408	-17.226
1194	-6.583	1044	-1.345	1515	-2.052
734	-4.786	1067	3.224	34	-22.795
586	-9.63	932	2.066	1071	-0.497
772	8.47	519	-12.268	1759	-12.247
464	-14.627	1144	1.195	2316	-4.319
746	-4.064	946	-2.118	1671	5.619
711	1.181	1151	5.977	80	-0.071
1092	4.371	1017	2.673	1086	-2.952
2012	-3.026	1516	6.95	172	-8.387
559	-6.807	1481	0.162	82	3.849
1071	0.749	1046	0.925	90	-5.4
1152	-11.706	916	-4.249	1555	-1.74
1026	-2.188	1066	2.975	20	-11.704
1175	2.918	807	-4.001	1300	3.715
1230	-10.653	423	-3.554	23	1.444
624	2.329	1001	1.183	1746	-15.958
1137	3.274	711	-9.065	1662	3.41
542	-2.084	1020	-2.524	1054	-2.905
1136	1.338	1259	0.471	1385	5.837
1871	-2.466	1020	-3.909	999	0.669
1015	-14.387	924	0.889	1225	-3.526
975	0.136	812	-4.663	1171	0.991
1149	-8.223	844	-9.82	1638	2.25
1177	3.935	980	-0.451	1661	-10.186
1176	-2.512	977	-1.27	1622	-1.899
917	-5.375	1072	1.115	1005	-2.536
1007	5.932	484	1.451	1479	8.446
1034	3.326	919	-4.424	150	9.814
722	-6.027	1219	-2.422	991	0.504
1828	-3.858	873	-2.742	1032	0.894
1188	-1.872	262	9.456	46	-18.952
810	4.613	1135	7.854	2813	-5.226
554	0.896	1139	-1.356	1343	4.413
1100	2.407	782	-8.87	30	-17.571
515	-1.696	930	2.226	1617	-2.036
1169	-5.283	427	-4.775	21	-8.712
1149	3.159	815	-0.595	384	-24.5
1088	2.87	942	-2.274	1286	6.933
1074	-0.217	780	-6.399	1787	-3.028
494	-0.598	977	-3.141	2092	0.024
1203	2.19	886	-5.64	1319	4.854
2332	-4.509	1082	-0.059	1132	3.642
609	0.785	1146	4.595	1649	1.839
1182	-4.091	808	-3.388	64	-19.934
1270	-2.91	842	-8.865	25	-1.493
1083	-5.54	649	7.431	1384	4.637
510	-2.35	825	0.855	67	-21.125
1220	-1.07	978	8.236	1080	6.542
559	-0.193	1056	8.397	911	4.406
1076	-0.017	616	3.506	1850	0.678
923	4.255	1635	-9.114	1457	1.566
1037	-5.576	509	-10.546	1576	1.595
505	-3.777	956	0.417	1368	-1.741
1080	0.078	505	-11.099	1580	-13.359
1183	-5.763	579	-2.72	1175	-4.648
559	0.487	650	6.644	1359	0.829
510	-1.579	2548	-13.264	91	-9.338
1087	-0.248	943	1.963	1030	-3.02
1035	0.827	544	-12.908	1096	-0.611
486	-1.913	604	1.658	1289	-4.315
1024	-2.933	583	0.924	888	-0.308
720	0.209	611	3.948	1310	2.372
602	0.61	523	-18.881	1695	4.175
748	-1.987	907	3.241	1544	-2.007
1102	0.831	922	1.744	1156	0.567
1136	2.049	940	2.923	2476	-8.973
498	-10.53	644	3.53	3	2.922
718	3.46	530	-20.445	1324	4.89
514	-6.851	619	5.926	154	-6.384
1070	-0.591	528	-22.206	59	-16.595
1084	-7.228	565	3.178	76	-4.34
1093	-0.029	905	6.432	1409	-0.938
1011	8.795	1020	-5.238	22	-3.384
544	1.753	600	1.449	2706	-1.446
1100	-1.045	1668	-7.07	61	-5.381
600	-0.564	675	13.908	1825	3.86
522	-0.524	527	-16.178	1082	4.938
1222	-5.267	2049	-3.635	1126	2.093
1066	9.668	692	12.017	129	-2.903
1041	-10.865	523	-19.916	1145	-5.921
1842	-3.101	543	-34.932	1423	-9.575
531	-0.096	590	-19.148	1692	3.353
545	-2.547	562	-1.273	1270	1.42
1058	3.281	543	-21.795	909	-3.542
1017	-17.915	922	-0.65	357	0.876
1028	7.687	518	-10.119	1760	7.112
589	7.95	1037	-4.244	2620	0.721
598	6.412	676	2.974	1959	-3.941
653	6.224	2014	-6.53	1895	-13.808
586	6.126	983	-5.107	1614	4.451
574	-16.674	534	-11.33	952	-3.105
586	3.095	538	0.629	1893	-16.077
597	5.717	2694	-6.402	64	10.541
616	-6.506	628	5.712	1431	3.518
2010	3.367	810	4.749	1521	6.409
664	5.863	723	-1.607	99	-7.439
550	3.111	285	2.78	68	-11.3
540	2.835	285	0.25	2146	0.043
2053	4.014	275	-0.455	1339	2.607
548	3.388	274	0.172	1651	1.967
585	5.563	293	0.82	271	0.005
539	6.006	286	-0.198	2470	-7.448
538	2.842	285	-1.937	2312	-13.257
567	3.481	275	-3.022	1071	12.69
2019	2.719	328	-2.201	2633	3.841
560	3.273	278	0.546	1718	-2.256
611	9.849	292	0.308	1797	-4.876
615	-11.017	323	1.278	1738	-3.614
575	6.284	284	-1.306	2644	-4.696
559	3.789	268	1.07	88	-12.516
2060	4.056	290	-1.455	171	-4.104
2080	5.52	272	-20.804	2150	-14.26
571	11.282	267	-5.177	1434	4.751
2043	3.657	515	-6.927	1047	-5.365
592	4.37	259	-2.281	7	-9.187
575	3.265	444	-3.858	984	-2.57
547	3.178	266	-2.616	1697	6.227
567	3.069	448	-4.842	1724	5.867
570	4.459	477	-2.02	1544	2.851
557	3.633	281	-1.2	1706	1.523
566	4.055	530	0.678	25	-13.011
561	3.177	274	3.598	2679	-6.883
551	3.317	274	-1.02	15	-6.821
568	5.563	273	-0.016	148	-5.91
579	5.41	270	-3.478	1543	-0.503
624	7.329	1300	2.337	1613	6.729
606	5.165	959	-9.078	2823	-6.289
601	6.352	1613	-9.244	1214	4.157
567	3.612	1194	-4.36	1080	5.286
571	4.856	1289	6.046	205	-4.227
2011	2.384	1328	1.195	1528	-0.778
585	6.383	1150	-0.692	2195	-11.998
2250	-5.34	2115	-3.366	80	-22.389
2172	1.183	2025	-0.199	1570	3.311
550	5.96	1336	6.387	2602	-17.752
606	8.469	1437	-1.757	1609	-1.974
580	11.049	1533	-7.554	1409	6.576
593	5.615	2120	-4.722	27	-3.069
559	3.752	1402	-2.025	1737	8.066
606	5.108	1035	0.411	1545	4.631
556	9.083	1292	4.265	28	-11.389
546	3.117	1483	-8.044	1363	7.189
549	3.517	1250	-4.713	1651	1.802
1957	-2.551	2506	2.495	1626	3.264
579	-35.329	1037	-3.076	1086	4.648
590	8.609	1354	-11.292	1670	10.679
557	1.438	1177	0.74	1092	4.658
578	6.389	2606	0.48	21	7.797
578	-21.846	1784	2.8	2908	-1.858
571	8.941	1394	-6.624	2604	-0.367
546	3.877	1263	-5.95	1067	0.523
550	3.84	1331	1.995	3080	3.427
547	3.63	1365	-12.185	17	-10.749
544	1.984	1791	-8.098	1127	0.277
558	6.991	1435	-5.578	1532	4.261
615	-24.536	1426	6.517	2770	-1.734
542	-11.411	1165	-2.754	1456	5.423
2079	4.254	1480	-9.278	1760	-20.111
562	4.526	1107	1.911	36	-12.76
569	3.902	2384	3.345	93	1.722
591	3.452	2054	-2.05	1087	0.829
2016	4.093	1800	1.264	40	-27.25
575	5.224	2155	4.035	375	0.904
542	1.853	1369	-6.019	26	-15.961
549	3.018	1020	-3.331	1569	3.977
542	3.599	1406	-9.766	937	2.092
2060	1.412	1977	-11.56	1552	3.529
539	2.072	1107	1.071	2955	0.335
558	6.667	2098	-1.249	442	-6.007
2145	7.764	1083	-16.418	1017	-5.319
558	4.516	1052	-19.374	1071	1.178
575	8.263	1077	-2.195	1125	7.035
570	3.521	2565	-2.943	1487	4.543
462	-4.668	2028	-5.728	1033	-3.06
532	2.992	1256	-4.617	1656	8.363
574	4.291	984	2.007	249	-3.72
2159	7.184	1072	6.744	2621	-3.916
543	3.565	1020	-13.9	2154	-6.688
2077	2.789	1076	5.682	2622	-7.113
570	4.223	1111	6.454	173	-0.625
720	8.329	2017	-12.669	1682	1.613
537	2.973	1033	6.608	2430	-17.81
574	4.137	1133	-13.792	2174	-5.35
632	5.279	1233	-10.085	2134	-4.63
621	5.616	1098	6.187	1976	-14.061
2096	5.361	1076	-9.646	1621	-3.234
576	4.356	1832	-6.087	2096	-3.041
2184	4.485	1944	-5.115	4	-0.268
574	4.184	1039	-20.518	2079	-12.344
2056	3.19	1037	5.126	2615	-7.094
570	-8.414	1903	-4.046	2658	-7.363
2087	6.206	1035	-12.324	1909	-0.566
540	8.69	976	3.239	2543	-9.355
557	3.886	1935	-6.167	1520	-3.484
601	4.99	1922	-5.69	616	-10.355
607	-1.875	1043	5.613	2580	-9.754
566	6.184	1057	4.297	2713	-6.38
2085	5.422	1950	-9.256	2086	-9.22
617	6.028	1102	6.882	2187	-2.091
571	5.363	1854	-4.387	1153	4.546
593	8.519	1061	-9.875	2451	-6.357
565	4.485	1950	2.919	2579	-8.396
571	8.938	1763	-3.919	2978	-1.556
573	8.993	1133	7.036	2856	-2.274
577	7.585	1400	10.062	2569	-7.849
2058	5.92	2413	-5.447	2694	-5.12
1906	6.233	1137	-10.971	2747	-4.557
591	5.053	1998	-2.697	2143	-7.521
584	6.74	1326	-14.483	251	-0.117
574	4.885	2584	-3.13	11	3.062
596	8.862	1014	2.6	2160	-6.378
602	6.121	1966	-8.627	611	-1.565
636	8.325	1063	2.087	2131	-7.348
623	5.86	1040	-10.537	2777	-3.273
2042	4.06	1944	-12.998	3006	-4.719
2246	2.806	1039	-1.193	2147	-11.052
2152	6.606	1059	4.561	302	-21.011
605	2.297	1072	-10.499	2092	-11.519
2131	5.759	1062	-17.641	2629	-6.281
580	6.07	1054	-13.991	1150	3.3
568	-2.708	2685	-0.207	2636	-12.457
576	1.684	991	-13.519	2638	-10.256
590	6.611	2016	-1.754	2152	-7.032
601	7.709	1047	5.904	2074	-15.683
605	-4.865	1102	4.351	549	-12.572
612	-3.856	2015	-8.138	1388	-3.657
563	6.173	1033	5.049	2584	-10.415
2073	5.62	1015	-18.416	275	4.401
593	5.796	1873	3.938	240	-1.491
588	6.669	1070	7.768	3317	-0.576
2085	4.241	954	-12.387	2102	-6.218
651	5.755	950	2.907	2684	0.772
2163	4.417	1277	7.685	2046	-9.545
584	5.021	1017	-14.511	2163	-11.67
791	9.152	1118	-15.772	2104	-6.01
2071	4.275	1128	-11.848	469	-4.808
577	4.118	1072	-13.065	466	-6.549
616	5.108	2015	4.368	12	-3.321
621	6.451	1722	1.451	680	-6.42
585	4.766	1265	-16.146	2124	-7.901
604	6.288	1235	-11.276	2530	-8.762
600	-17.355	1799	-6.417	2846	-15.076
576	4.787	1117	-8.493	493	-4.347
665	8.142	1033	-13.893	2156	-7.9
612	6.921	1011	-6.647	2127	-8.048
573	0.841	1031	1.384	2063	-18.28
576	3.974	1118	-6.994	2204	-15.657
596	8.889	1094	4.554	2674	-5.312
2115	4.335	1080	1.195	2180	-14.951
605	9.386	2002	-3.205	483	-15.251
2088	4.95	1092	8.453	2590	-8.054
2094	-7.278	1057	3.257	2082	-3.689
586	4.462	1020	8.934	2979	-3.045
561	5.465	1077	1.939	117	2.652
628	4.539	1065	-0.707	2152	1.734
554	9.183	1124	6.138	2128	-6.953
565	8.94	1098	0.055	2157	-6.311
2134	1.168	1213	-14.24	1225	1.384
581	3.775	1320	-7.247	1819	-4.93
564	4.097	2528	-0.073	1366	-1.032
577	4.481	1088	-13.761	91	-5.543
548	-3.542	1187	-6.005	256	-3.238
2072	3.224	961	-17.732	2177	0.952
595	4.667	2462	-8.211	2679	-4.979
605	5.86	991	-11.13	3173	1.822
567	3.703	1250	-15.252	1976	2.224
566	-0.412	943	-7.488	2081	-7.965
607	-12.659	967	6.317	2664	-7.488
574	-3.688	1969	-5.022	1086	-5.284
2219	4.815	2129	0.752	2561	-7.889
2239	8.12	1884	-11.072	2864	-3.93
570	4.582	1018	-15.223	1568	0.927
693	7.801	1031	3.699	2809	-14.104
580	8.072	1017	-14.058	2457	-14.061
550	6.998	1070	-6.16	2053	-14.591
2036	4.293	2150	4.245	2070	-5.748
557	-1.044	2017	-3.313	260	-1.497
611	9.515	2383	-1.063	2630	-0.091
668	-6.544	1098	-4.907	2043	-1.284
563	3.745	1189	-11.765	2691	-7.184
565	3.625	1100	-10.812	2661	-8.937
2059	4.093	2028	-8.754	1604	-27.273
2145	6.264	965	-2.276	16	-6.81
2074	4.42	1109	2.026	1917	-12.718
2021	3.876	1278	4.706	2006	-9.297
563	-1.723	1031	-2.087	2822	-8.98
2108	-3.198	1110	7.995	2185	-3.546
2029	1.677	989	-11.531	1229	0.684
619	0.867	1100	-4.456	2077	-8.425
603	5.092	1094	8.868	2267	1.746
2055	-0.209	1811	-4.282	2541	-13.236
657	1.124	967	3.579	369	-3.135
657	-15.721	1133	-16.823	241	-5.555
560	-3.347	2078	2.845	2653	-8.23
654	7.129	1133	8.991	2008	-11.318
661	9.485	1056	-11.414	2069	-7.379
869	2.55	1865	-1.006	2125	-4.323
820	7.374	1976	-4.538	2171	-9.236
2627	-0.754	1100	-12.916	2054	-15.113
674	-7.714	1822	2.239	2080	-7.943
2072	3.108	1118	-12.676	2629	-7.773
2124	3.699	1146	3.452	2143	-0.676
577	-13.507	1411	8.601	3092	-4.521
968	6.711	1431	-4.322	1998	-9.208
2180	4.903	2144	-10.604	2107	-8.941
1920	0.051	1543	-10.207	2620	-6.055
622	-8.821	1110	-4.37	2216	-5.434
601	-25.084	1566	-9.408	2166	4.036
614	-25.17	1431	-0.721	2070	-11.972
677	0.873	1387	-4.205	2533	-9.667
663	-12.881	1395	-2.584	3084	-1.78
605	-20.287	1210	-3.844	2691	-9.751
1823	0.726	1194	-1.648	2150	-7.539
680	-10.952	1800	-1.364	1956	-12.152
654	-16.967	1606	-10.432	2643	-10.756
2022	0.176	1317	-7.971	2122	-10.231
636	-11.053	1531	-9.666	1091	-2.417
2036	3.87	1706	-7.381	2138	-7.564
964	-5.075	1644	-0.24	2100	-10.022
913	12.906	1265	-6.594	2093	-8.351
652	-2.56	1166	1.196	2117	-8.184
616	-5.146	1581	-0.512	3320	-1.026
963	5.986	1298	-1.648	2090	-6.523
2339	6.332	1928	-5.925	2209	-3.665
691	-15.497	1283	-6.778	2081	-6.372
597	4.25	1472	2.151	1285	2.515
1853	-4.264	1650	-4.955	2104	-5.86
727	11.484	1066	-7.608	1849	-1.811
1840	-3.579	1531	-12.703	2744	-6.917
681	-6.062	1320	-7.208	1924	-7.445
917	4.059	1318	-2.867	2635	-8.745
749	-0.964	1192	-5.506	3068	-1.491
691	-3.232	2706	-5.214	2420	-13.95
1042	-8.825	1435	-13.166	2163	-2.451
629	-14.369	1150	-4.511	1998	-11.585
2451	-5.156	1572	-7.506	2639	-9.243
653	-11.385	1121	-9.853	32	-3.077
733	5.308	1298	-6.1	2543	-8.577
609	-10.946	1352	-8.494	630	2.023
691	-19.985	1569	-7.29	1151	1.137
1042	-2.747	1917	-8.221	2126	-7.638
676	-4.297	1080	-5.82	2591	-7.635
998	-14.048	1278	-16.821	2474	-11.581
630	-21.372	1398	-8.487	2336	-12.997
790.7	3.492	1317	-9.338	2118	-9.643
3106	-3.721	1425	-5.68	2085	-8.288
630	-22.513	1752	-0.084	2240	-2.999
688	-4.733	1458	-3.185	2625	-6.473
3308	-4.392	1454	-1.947	1912	-16.255
948	7.543	1650	-7.614	2237	-2.355
809	-7.488	1139	2.999	2218	-6.349
789	-5.992	1187	1.098	2163	0.795
641	6.637	1092	-3.905	264	-2.711
688	-11.633	1131	-4.387	2655	-8.066
1944	-0.084	1355	-8.873	2779	-1.539
965	-2.747	1254	-1.207	570	-1.527
654	-10.043	1298	6.218	2680	-6.461
613	-9.602	1262	-4.456	1157	3.578
1794	1.556	1498	-0.9	2599	-10.194
2121	-3.533	1209	3.445	2124	-6.771
652	-7.173	1061	-5.473	1248	2.542
2081	-2.649	1122	-4.008	2666	-6.163
697	-28.346	1329	-2.565	2192	-4.96
621	-18.787	1173	-2.51	2720	-12.475
2040	0.766	1017	-16.851	2686	-3.708
572.6	-5.175	1225	1.482	2140	-5.719
596	8.83	2413	-2.283	2623	-7.214
963	0.448	1306	-13.068	2106	-12.125
653	-5.715	1192	2.303	3023	-7.183
953	9.388	1189	-0.135	2639	-5.505
612	-20.145	1292	-4.572	2231	-1.811
617	-15.907	1257	-7.303	2200	-4.673
1074	-5.772	1102	-1.603	2706	-10.319
644	-14.528	1272	-6.232	2824	-5.155
952	4.339	1289	-1.147	284	0.321
1833	4.347	1351	-2.667	1187	-0.424
2077	-0.358	965	-4.397	2222	-4.171
2489	-1.267	1198	-9.5	1937	-5.225
1019	-7.264	1737	-3.693	77	-2.233
927	7.501	1340	-2.608	2124	-9.12
588	-0.723	1283	-1.108	2112	-3.2
696	-18.503	1158	-3.81	2168	-4.395
634	-14.19	1280	0.036	2168	2.08
591	-1.257	1191	-2.427	2579	-9.115
681	-9.135	1122	-3.17	2051	-9.498
620	-21.76	1428	1.29	2623	-10.771
995	-3.127	1502	-11.114	2673	-12.432
545	-13.19	1261	-4.913	1467	-3.276
2273	1.787	1032	-3.178	2585	-4.394
792	4.294	1644	-2.266	1794	-14.67
684	10.293	1533	-11.588	2658	-7.299
619	-5.555	2336	-6.62	2091	-15.121
644	-3.75	1076	-4.857	1998	-4.964
657	-6.757	1256	0.105	102	3.399
605	6.645	2028	4.776	2632	-3.682
939	-0.497	2000	-2.016	1147	0.078
619	6.232	1176	-2.896	1808	-6.849
649	8.02	1218	-3.998	3232	-1.026
732	1.548	1124	-4.942	2707	-6.055
677	-20.088	1039	-4.563	1998	-19.808
701	9.041	1229	-0.5	2132	-7.228
676	-24.773	2516	-4.359	1255	-11.212
652	-6.589	1987	0.427	328	-4.011
639	-3.657	1093	-3.454	2630	-6.68
651	-11.481	2757	-3.008	2093	-4.145
648	-0.684	1391	-6.718	2157	1.961
665	-17.72	1269	-0.905	2023	-0.266
837	-6.548	2032	-8.372	2165	2.715
2094	4.583	1369	-13.741	461	-10.743
663	-1.826	1439	-0.036	2066	-7.353
666	3.944	1314	1.834	2178	-8.141
672	-0.237	1056	-1.286	569	-0.432
676	-14.387	1257	-14.361	2118	0.525
627	0.064	2275	-7.334	551	-17.902
589	-8.137	1317	-2.344	2083	-1.687
2363	3.582	1369	-9.292	2136	1.399
770	11.175	1098	-5.449	557	-5.327
689	-6.084	1683	-14.185	2092	1.291
588	-2.097	1054	-5.566	2092	-0.045
598	-2.301	1150	-0.359	433	-1.298
658	-13.931	1083	-3.2	499	1.616
679	-3.009	1329	-0.799	427	-2.697
1003	11.87	1503	-0.685	2688	4.488
636	-10.773	1354	6.236	1320	7.414
690	-10.196	1905	-4.155	486	-4.692
689	-13.549	1151	-2.07	1300	11.875
727	-0.194	1540	-9.401	1104	8.514
2091	5.67	1183	-6.713	1814	-4.666
635	7.912	1054	-8.466	485	-0.736
790	1.204	1680	8.884	2051	-0.528
678	0.744	1606	-0.202	597	-31.298
900	8.621	1203	-7.735	2051	2.115
747	6.62	1300	-0.113	500	-20.387
659	-9.96	1131	-2.841	2082	1.251
708	0.045	1421	-1.358	531	-1.933
701	-0.53	1544	2.994	500	-16.811
932	0.678	1287	4.977	464	-33.974
700	11.345	1387	-3.176	362	-43.567
2478	-10.7	1228	2.874	617	-34.887
2109	1.763	1306	3.17	2250	-3.852
682	-10.432	1399	5.294	2156	0.741
670	-6.888	2000	-4.537	2212	4.148
2159	1.998	1581	-4.712	2841	1.562
1057	-6.842	1102	-1.768	2756	-0.179
663	-5.842	1267	-6.165	2180	-2.049
679	0.248	1267	0.307	2310	1.829
834	-9.464	1077	-7.336	2759	-3.375
736	5.582	1107	-4.872	2171	1.144
1025	7.679	1198	-17.822	2110	-3.595
1036	-4.236	954	-2.416	2169	4.447
677	9.117	931	-1.113	2140	1.73
651	7.239	1463	-8.455	2112	-6.219
918	-3.603	1144	-4.125	2759	-12.112
839	-13.84	1109	-9.217	2121	-0.276
1050	-2.075	1100	-1.975	2182	1.398
1368	-24.788	1235	-3.435	2186	-5.571
784	-7.135	1435	-2.979	2252	-8.478
917	11.346	1083	-1.279	2202	3.065
664	-12.682	1054	-1.11	2140	1.685
1050	-17.46	1050	-4.336	2702	-5.523
994	4.452	1166	-0.281	2110	0.929
825	1.85	943	-3.502	2155	6.075
2536	0.065	1231	0.42	2114	4.114
743	10.852	928	-3.842	2735	-7.213
766	11.076	1020	-5.108	2162	4.545
650	3.182	1239	-7.746	2209	0.935
2556	3.383	1006	-5.149	2222	2.719
714	9.002	1355	-4.075	2133	5.128
603	-12.465	1092	-5.894	2113	5.079
621	-0.288	1254	5.671	2198	4.604
2453	2.342	987	-2.419	2205	7.778
2060	-3.806	943	-6.172	2154	3.045
995	8.927	991	-2.267	2768	-7.076
2802	1.911	1722	-2.5	2153	4.942
579	2.107	1203	-2.209	2134	3.817
736	9.902	1139	-0.29	2144	1.104
2562	2.766	974	-11.668	2219	3.142
841	-22.203	3094	-2.372	2141	4.773
1039	-8.854	3223	-0.856	2132	3.901
734	10.944	3227	0.211	2131	4.239
845	3.988	3235	0.361	2093	3.398
735	7.353	2653	-4.809	2198	7.895
1129	7.781	2661	-12.425	2193	3.261
868	-6.703	3232	2.106	2122	2.567
584	-13.492	2700	-8.804	2177	3.777
842	-10.012	3146	-4.065	2205	8.312
719	7.116	3154	-1.284	2145	4.267
2373	-2.401	3213	-1.049	2123	1.638
972	6.367	2549	-12.034	2151	2.935
880	7.458	3184	-0.753	2113	4.746
2006	-0.206	3144	-1.913	2152	2.465
1067	-14.637	3240	1.647	2145	3.253
752	6.151	3166	-2.184	2090	-0.19
2165	7.187	2272	-12.524	2127	7.301
709	5.844	3486	-0.759	2147	5.963
740	12.925	3406	0.197	2160	4.439
748	-18.049	2505	-11.82	2186	2.135
721	10.388	2710	3.326	2139	3.398
707	8.597	2710	0.89	2155	0.978
600	6.685	2710	5.467	2151	2.875
712	12.628	2710	4.557	2171	5.316
702	10.344	2710	0.454	2138	4.556
114	10.982	2710	3.13	2137	1.997
710	8.583	2710	1.355	2133	0.528
705	8.828	2710	4.48	2111	2.48
134	3.972	2710	0.688	2130	4.388
702	9.896	2710	4.156	2121	0.835
701	11.017	2710	4.523	2128	3.351
775	9.765	2710	4.148	2121	8.697
721	8.964	2710	0.68	2125	3.23
712	13.748	2710	2.835	2110	3.477
710	6.869	2710	1.894	2622	-6.847
729	12.186	2710	1.782	1533	2.296
668	7.948	2710	0.397	1582	3.802
721	11.712	2710	3.648	2136	0.65
634	-19.669	2710	2.56	2145	0.426
642	-18.48	2710	4.891	1552	-0.2
735	10.565	1885	2.071	2209	-6.813
707	11.026	1885	3.255	2219	5.508
706	8.268	1885	2.067	2826	-0.217
715	11.627	1885	2.082	2829	-8.325
708	14.147	1885	2.19	2615	-4.231
708	11.229	1885	5.224	2109	-4.626
705	10.552	1885	3.432	2071	-10.467
709	9.274	1885	-0.122	2153	5.662
758	11.393	1885	-0.009	1983	-8.77
500	4.827	1885	0.815	1994	1.606
510	6.015	1885	3.707	2086	-16.649
711	11.539	1885	5.192	2055	-13.165
709	10.887	1885	3.811	2571	-3.36
507	6.144	1252	-9.88	2160	3.902
707	11.41	1885	3.422	2713	-2.897
706	10.744	1885	-0.622	1536	-0.858
711	8.937	1885	2.759	3118	-2.027
604	8.626	1885	3.103	1539	1.163
723	11.306	1885	2.204	1530	1.105
715	10.704	1885	2.247	3422	3.529
704	9.065	1885	4.429	3542	-2.062
717	11.466	1885	4.062	2628	-9.828
599	2.518	1885	0.136	1587	-0.239
709	10.825	1885	1.766	2726	0.433
704	9.446	1885	3.55	2181	2.086
712	10.31	1885	3.099	2132	-0.188
711	10.396	1217	-9.282	2064	-13.323
712	10.536	1885	0.645	2064	0.213
722	8.521	1885	-0.351	1620	2.682
716	11.899	1885	2.131	2162	0.439
665	-30.084	1885	-2.173	2072	-10.43
707	7.532	1885	4.834	2174	4.507
724	11.163	1885	2.777	1543	-1.077
605	9.158	1885	-0.907	2043	-12.751
510	5.486	1267	-8.146	2584	-7.288
753	8.966	1387	2.377	2201	7.14
502	7.622	1418	-8.579	2835	1.452
709	12.959	1376	-3.225	2089	-3.37
506	7.818	1343	1.353	2869	1.141
507	5.499	1672	-4.818	2092	3.589
719	9.018	1383	-5.089	2127	3.476
509	4.312	1231	-1.287	2169	4.965
506	9.539	1724	-3.99	2149	1.836
634	8.816	1248	-0.266	2139	2.496
691	7.824	1409	3.559	2124	1.201
596	7.383	1329	-1.225	3081	-4.609
504	6.878	1411	0.109	2203	4.755
506	6.018	1354	-6.298	1819	-3.284
659	-3.565	1331	-5.072	2741	-5.997
723	8.217	1287	-2.289	2135	4.368
500	4.657	991	-7.651	1804	3.708
702	8.667	1174	-2.404	2472	2.369
703	8.574	1400	0.953	1592	2.749
516	3.314	1266	-1.141	2705	-4.4
721	9.725	1189	-0.595	1570	0.482
714	8.786	1465	-13.73	2127	6.933
643	-10.65	1350	-5.109	2131	3.681
694	11.128	1392	-8.81	2440	-5.378
644	6.999	872	-8.769	2155	-9.794
709	8.289	1361	-12.133	2210	1.446
718	10.308	1596	-6.644	2177	2.714
710	7.432	1276	-11.89	2266	-3.01
729	9.044	1329	1.115	2172	-1.574
723	11.058	946	-7.515	2202	-2.004
606	3.834	1377	-10.732	2199	2.825
721	9.86	1503	-5.813	2703	-6.686
708	10.084	1769	-3.013	1831	-0.26
707	9.308	1369	1.546	1568	5.539
706	9.804	1565	-7.269	1568	-1.127
700	10.502	2013	2.021	1825	0.809
690	8.893	1374	-2.274	1770	1.622
704	11.945	1261	-13.318	2212	1.761
688	7.835	1395	0.918	2125	5.496
692	12.676	1544	4.447	2976	-2.8
700	9.339	1452	2.26	2213	-3.707
696	8.655	1850	-4.147	2265	-2.409
712	11.971	1352	3.377	2181	2.109
696	6.348	1510	-11.016	2204	-3.114
696	7.736	1443	-5.142	2211	0.591
698	10.542	1336	1.224	2372	-2.87
697	8.728	1331	1.257	2227	1.689
705	9.136	1728	-4.485	1991	-7.723
700	10.018	1206	-14.018	1521	-10.37
701	10.082	1681	-4.892	2145	-0.577
712	10.721	1787	-2.831	2119	-5.221
706	8.19	1326	-8.755	1552	0.377
705	11.8	1666	-6.335	2147	1.974
723	9.457	1389	0.686	2705	-5.663
707	5.866	1599	-8.748	1786	-4.886
706	10.074	1307	-6.81	2715	-3.588
715	10.639	1214	-1.953	2693	-1.2
711	4.353	1617	8.685	2733	-3.423
711	6.809	1773	5.562	2246	2.74
694	9.168	1211	-18.668	759	-18.895
714	8.837	1146	-10.45	947	-8.074
530	2.719	989	-6.711	591	-7.182
600	6.533	1009	-9.633	567	-12.41
580	1.598	1480	1.473	1959	9.496
655	3.93	1387	-6.961	2076	-15.024
560	1.724	1717	-4.426	1672	1.468
600	2.649	1600	-8.554	2760	-8.539
615	4.739	1433	3.305	620	-12.14
600	2.421	1933	0.337	647	-23.379
560	1.977	1532	-3.752	588	-22.428
600	3.598	1411	2.252	3389	-5.074
655	9.36	1209	-1.349	604	10.431
585	6.13	1392	0.217	947	-5.999
600	0.796	1300	-0.117	2187	-4.081
560	-0.677	1795	9.958	2650	0.139
710	6.076	1376	-7.607	712	-2.707
600	-4.313	1369	2.281	2447	3.364
795	7.564	1595	-11.367	1996	-16.932
740	6.12	1124	-2.213	1753	-16.977
865	6.702	1324	-7.365	2120	-14.655
608	2.754	1702	-2.609	2056	-13.364
620	2.236	1400	2.836	2107	-15.059
635	2.739	1300	-13.49	559	-39.122
622	5.011	1210	-7.761	754	-27.115
626	1.834	1261	-9.068	2089	-12.768
633	1.878	1263	-1.261	602	-25.218
596	1.656	1426	-7.018	2086	-7.107
617	3.133	1144	-5.365	2078	-11.574
593	2.547	1288	-4.761	2088	-15.225
569	0.692	1439	-6.836	725	-33.901
610	4.609	906	-8.815	2613	-10.449
602	3.97	1332	-5.804	1748	-19.197
758	1.05	1322	-6.95	2078	-13.03
798	2.298	1252	-1.825	2093	-12.511
722	-1.108	1389	2.827	606	-16.443
631	3.071	1346	-5.341	638	-25.756
792	1.883	863	-9.27	642	-19.786
660	3.684	1303	-4.038	2071	-4.578
756	4.065	1426	-0.315	668	-25.204
619	3.533	2128	-7.213	743	-28.293
609	3.96	1322	-12.306	1789	-16.008
594	1.719	906	-8.564	2193	0.8
487	-15.45	1181	-4.153	606	-26.097
493	-9.641	1995	-5.81	749	5.838
486	-18.219	1056	-10.784	2191	-3.438
493	-11.469	2021	-8.964	2125	-22.596
493	-12.558	1325	-0.206	2083	-1.492
492	-14.14	1776	-10.042	716	-13.128
490	-15.145	1062	-5.097	2184	-1.137
495	-17.708	1876	-1.633	623	-25.578
1210	-0.984	1229	-9.101	1212	3.056
1175	-1.837	909	-9.701	2659	-8.633
1150	3.926	1407	-4.33	2197	-6.22
1138	-9.819	1218	-0.362	2099	-7.824
1080	-7.031	1272	-3.117	642	-22.434
1143	-0.701	1477	5.917	2200	0.299
1419	-3.695	1331	-1.501	2463	-13.776
1711	-1.618	1672	-0.786	2239	-6.472
1073	-7.045	1595	-7.985	717	-27.112
1062	-8.861	1255	-2.467	640	-24.475
1325	1.561	1056	-3.51	633	-3.262
1850	-6.823	1028	-5.494	2074	-8.297
1220	3.477	1133	-4.27	2026	-6.278
1190	0.449	1039	-8.806	2383	-13.322
1380	-10.693	835	-6.923	2010	-12.012
1380	-7.526	1273	-9.052	3273	-3.838
1380	-1.795	992	-7.709	1673	-18.349
1380	2.32	600	-13.87	2476	-0.097
1380	-3.769	1154	-3.818	624	-26.501
1380	-5.898	863	-15.169	1860	-24.261
1380	-8.121	1028	-6.083	2656	-3.953
1380	-4.539	643	-13.069	1881	-23.162
1380	-5.081	1065	-7.925	1389	4.685
1380	-7.932	1261	0.138	2837	-3.336
1380	-7.439	1232	-0.509	2753	-1.331
3020	4.026	1150	-2.174	2676	-1.779
3450	-0.91	1106	-5.237	2711	-0.098
3034	1.962	1056	-5.702	1889	-17.988
3041	1.456	1226	-1.755	2180	-12.32
2963	4.808	880	-8.767	2281	-13.052
3285	0.292	881	-5.768	2676	-9.867
3335	0.76	1032	-5.157	2855	0.134
2901	0.267	1081	-3.168	2839	-2.028
2961	-0.037	1143	-4.54	2877	0.371
2860	0.072	1059	-5.542	2881	-0.579
3062	0.472	963	-4.995	2798	-2.023
3040	-0.263	924	-6.38	2803	-0.738
3161	1.653	859	-5.846	2856	-0.312
3279	0.724	977	-6.737	3193	-5.871
2960	3.636	750	-12.487	2855	-7.789
3440	-1.824	1232	-6.593	2875	-4.811
2970	2.454	857	-6.802	2857	-1.215
3303	1.198	798	-9.438	2864	-0.142
3251	0.36	932	-11.929	2737	-0.781
3252	0.879	876	-4.002	2406	-10.044
3087	0.555	969	-4.164	2491	-6.536
3321	1.527	972	-4.2	2593	-6.41
3048	-1.936	1115	-4.493	2729	-1.755
2958	1.242	1295	-2.029	2860	-2.983
2934	0.869	961	-9.707	2557	-7.15
3223	2.628	1465	1.488	2857	-2.603
3069	1.217	961	-5.968	2610	-6.197
2981	-1.651	852	-6.532	2708	-4.899
2942	3.599	861	-6.676	2769	-5.91
2930	2.749	1072	-12.448	2904	-8.941
3044	0.06	963	-9.523	2677	-5.605
3076	0.338	1133	-0.909	2505	-12.287
3043	0.997	1018	-8.177	2398	-13.898
3068	2.692	1565	0.145	2665	-8.099
3093	3.54	987	-5.777	2880	-1.856
3058	5.25	989	-3.255	2766	-4.404
3137	-0.301	1328	-0.876	2849	-9.155
3072	-0.333	1365	-4.59	2761	-8.397
2938	0.869	1131	-1.908	2322	-16.475
3047	3.185	1021	-3.619	2817	-5.603
3288	-0.116	1239	-6.93	2635	1.147
2907	1.246	1018	-3.237	2720	-6.712
3016	-0.241	1150	-2.286	2696	-6.996
3089	1.058	1231	-0.709	2702	-18.641
3063	-1.126	943	-5.505	3290	-4.942
3153	0.697	969	-6.768	2919	-2.642
3053	0.79	1043	-4.377	2702	-7.406
3071	3.477	1166	-0.401	2738	-7.784
2926	2.098	1094	-4.107	3079	-4.199
2969	-1.176	1065	-7.556	2593	-9.701
3077	0.452	1043	-6.47	2712	-6.869
3287	-1.257	1033	-7.181	2668	-7.938
3266	-1.742	1056	-8.355	2872	-5.749
3102	-0.083	992	-5.559	2875	-7.315
3069	1.318	1031	-5.948	2727	-9.901
2940	0.156	833	-7.138	3370	-3.489
3205	0.509	880	-7.961	2950	-2.926
3073	0.568	1076	-5.045	2669	-7.407
3057	2.818	1035	-4.551	2693	-12.317
3044	2.413	965	-5.794	2875	-7.555
3188	3.194	833	-8.295	2867	-8.402
3030	-0.601	1339	-8.763	2819	-8.293
2985	1.809	1031	-4.172	3183	-5.206
3287	-0.372	1054	-7.629	2717	-6.957
2977	2.594	1569	6.404	2989	-6.644
2942	3.74	765	-11.165	2704	-9.703
3064	0.758	1076	-6.37	2883	-5.92
2972	-0.528	1035	-7.668	2875	-7.759
3303	-0.048	946	-8.902	3195	-6.6
3276	0.169	1665	-9.931	2858	-7.324
2881	1.666	900	-6.019	2822	-9.292
2903	2.109	1820	7.823	2851	-3.1
3073	2	772	-11.078	2729	-7.305
2942	1.197	1451	0.111	2481	-2.968
3068	2.964	906	-5.733	2820	-1.163
3080	-0.069	1065	-9.714	2996	-8.738
2948	2.661	1054	-10.865	2858	-5.048
2941	0.776	883	-8.308	2815	-7.062
3056	3.995	965	-7.194	2740	-10.965
3060	1.274	1006	-3.777	3385	-6.922
2991	-1.628	896	-6.888	2897	-3.249
3042	1.465	1098	-3.075	2923	-3.552
3062	-0.233	1174	-3.569	2797	-7.01
3067	-0.537	1272	-2.716	2845	-8.768
2927	1.456	1243	-12.771	2839	-9.005
2949	0.716	922	-8.931	2439	-15.116
3180	0.602	928	-8.807	2843	-6.372
3072	0.758	961	-8.146	2856	-2.364
3070	1.198	1250	-5.724	2903	-6.381
2932	2.34	976	-7.822	2673	-7.213
3037	-0.076	1176	2.088	2553	-10.467
3063	0.607	969	-8.305	2545	-11.755
3068	3.026	1000	-1.381	2623	-9.401
3069	0.377	967	-5.719	2747	-2.947
3300	0.018	881	-5.516	2911	-3.875
2911	1.505	1055	-6.089	2656	-7.659
3242	0.677	1003	-11.419	2661	-8.76
3295	-0.597	789	-12.368	2853	-6.645
2944	0.732	931	-2.486	2280	-14.85
3015	5.428	967	-9.923	2894	-7.142
3132	0.749	1765	-5.705	2685	-4.888
2952	3.164	1039	-4.512	2685	-11.345
3067	3.622	1109	-1.297	2741	-7.856
3065	0.43	1069	-8.703	2677	-6.258
3110	0.046	1029	-1.64	2890	-3.4
3122	-0.113	577	-4.095	2871	-1.39
3076	-0.712	682	-3.206	2557	-3.731
3024	0.986	595	0.611	2962	-0.669
3067	1.647	583	-2.447	2566	-1.193
784	6.555	875	4.326	2720	-0.221
727	5.699	644	3.299	3301	-3.246
794	9.5	1048	4.044	3305	-5.547
783	9.211	1091	8.355	2639	-5.278
691	3.174	784	5.038	2712	-7.356
781	0.702	1150	2.044	2643	-5.987
621	3.163	966	5.454	2666	-4.385
3252	1.146	777	-4.022	2658	-7.037
3262	0.289	993	3.215	2862	-1.546
2947	-2.109	623	1.033	2789	-3.233
2888	1.694	598	-11.869	2910	-4.536
3023	3.394	593	-1.556	3430	-3.849
2975	-0.048	725	1.561	2797	-7.893
2945	-0.022	553	0.404	3297	-6.023
3160	2.82			2436	-14.105
3155	2.891			2553	-10.482
3301	2.455			2699	-8.141
3287	2.413			2871	0.133
3338	3.427			2661	-1.197
2922	2.587			2578	-9.424
2962	1.08			2650	-7.097
2979	-0.09			2560	-12.743
2934	0.57			3307	-1.669
3181	1.914			2623	-6.625
3141	1.338			2657	-0.109
3380	4.151			2714	-6.426
3382	2.575			2448	-5.947
3243	0.739			2704	-6.836
2940	-0.417			2859	-6.292
2922	-1.973			2648	-4.909
3294	0.416			2624	-6.692
3255	0.573			2530	-9.871
3261	0.795			2684	-5.226
3248	0.374			2888	-5.456
2911	0.221			2850	-9.496
2954	2.268			3055	-4.683
2963	1.035			2732	-10.551
2878	2.361			2023	-22.535
3290	0.62			2866	-5.862
2910	0.929			2822	-8.504
2941	1.176			2751	-5.638
2933	0.866			2854	-8.674
3078	0.128			2852	-9.209
3209	-0.062			2831	-8.12
3217	3.741			2919	-0.349
3102	1.585			2379	-13.802
2946	2.664			3008	-5.928
2945	0.492			2877	-7.295
2953	1.501			2709	-6.572
3258	1.23			3318	-4.494
3296	2.71			2900	-5.395
2912	1.694			2830	-10.215
3146	1.13			2909	-7.556
3204	2.502			3430	-3.43
2939	1.451			2875	-7.688
2947	0.79			2889	-8.423
2928	1.387			3179	-2.431
3195	4.753			2366	-13.743
2887	1.32			2898	-8.652
2937	-0.098			2889	-8.926
3218	2.023			2734	-6.528
3293	2.448			3107	-4.513
3254	0.639			2800	-8.489
3298	4.345			3534	-3.335
2972	0.918			2739	-8.396
3356	3.461			2701	-9.512
2932	0.457			2871	-6.538
3298	2.01			2873	-7.022
3294	1.327			3227	-4.597
3294	1.198			3077	-3.285
3289	2.566			2885	-2.902
3307	2.841			2902	-6.572
3291	1.359			3088	-4.685
3293	2.922			2891	-3.109
3296	1.433			2667	-10.199
2932	2.43			2496	-12.514
2945	1.517			3329	4.506
3299	2.046			2695	-8.146
3311	0.958			3298	-5.07
3257	0.033			2799	-6.943
3265	-0.238			2911	-2.921
2896	-8.639			2834	-8.795
3325	-0.738			2864	-6.698
2938	-4.643			2863	-8.882
3278	0.255			2698	-8.859
3245	-0.423			3194	-4.595
2962	-0.147			2868	-12.137
2933	0.929			2621	-12.961
3282	-0.059			3257	-1.904
2943	-1.722			2896	-9.665
2956	-0.875			2714	-7.61
2938	-0.412			2881	-1.91
3296	-0.426			3227	-2.801
3288	-0.54			2878	-3.035
3269	-0.746			2676	-6.657
3290	-0.618			2720	-5.251
3207	-0.51			2884	-2.965
3024	-1.548			3223	-5.574
3075	-0.062			3019	-2.869
3251	-0.456			3165	-4.801
3263	2.807			3342	-7.813
3285	-0.601			3543	-2.933
3301	-1.795			3432	-4.199
3220	1.287			3262	-5.097
3208	1.282			3299	-3.407
3245	1.261			3614	-3.225
3156	-0.095			3399	-1.05
2951	3.529			3335	-6.052
3233	1.551			3430	-3.55
3016	-1.706			3272	-4.452
2635	-11.32			3575	-3.404
3166	-2.519			3448	-0.855
2963	2.489			3428	-0.826
2919	2.542			3458	-0.585
3013	-0.228			3347	-0.582
3350	1.148			3448	-1.462
2841	-6.224			3446	-3.892
2964	3.543			3512	-3.245
2962	1.544			3568	-1.703
3005	3.082			3383	-2.398
2984	0.193			3578	-2.336
2975	3.181			3340	-0.775
3196	1.02			3446	-0.85
3140	-0.019			3443	-1.098
3183	0.106			3436	-1.019
2950	-1.104			3405	-2.465
2932	-1.313			3366	-3.512
3053	0.825			3347	-4.735
3057	1.24			3296	-5.651
3205	1.662			3532	-11.064
3188	0.949			3349	-4.113
3020	2.202			3314	-4.944
3021	0.122			3504	-2.135
2966	-1.022			3375	-4.244
3206	0.604			3564	-1.635
3232	2.104			3383	-3.778
3202	0.869			3368	-1.696
3205	1.612			3466	-1.499
3046	1.996			3357	-6.394
3055	1.505			3347	-2.453
3210	1.407			3075	4.246
2854	-0.627			3075	2.188
2223	-14.65			3075	3.761
3212	1.328			3075	2.628
2956	-0.682			3075	2.609
2958	2.372			3075	1.784
3221	3.587			3075	2.675
3231	1.963			3075	2.486
3115	0.304			3075	2.46
3184	1.178			3075	2.591
2976	3.04			3075	1.809
3009	1.443			3075	1.897
2893	-2.997			2961	-7.246
2948	2.827			2961	-7.316
2869	0.636			2961	-6.055
2890	2.045			2961	-8.041
2953	0.742			2961	-8.416
3163	-2.226			2961	-7.09
2947	2.658			2961	-8.008
2846	-4.063			2961	-6.097
3140	0.654			2961	-7.589
3139	-1.132			2961	-5.813
3195	-0.285			2961	-7.074
3170	2.553			2961	-7.553
3217	1.277			2961	-6.155
2932	-0.373			2961	-6.412
2939	2.102			1200	5.77
2928	1.417			1212	5.405
3236	1.381			1207	5.813
3235	1.705			1074	-0.093
2952	-0.393			1206	3.815
2897	2.351			1209	3.924
3170	1.181			1222	3.552
3168	1.852			38.9	11.618
3203	1.549			37.1	10.819
3185	0.534			36.9	5.04
3207	2.004			37.3	11.387
3206	1.178			37.3	9.875
3210	0.295			38	8.696
3100	-1.286			36.5	8.099
3043	-0.133			36.7	11.04
2943	3.59			37.3	10.282
2947	2.377			37.8	7.702
2945	2.211			36.3	9.534
3201	1.951			36.7	7.199
2958	3.863			36.6	8.966
2877	1.379			37.1	7.018
3054	-2.668			36.9	10.834
2960	1.65			36.2	9.698
3198	1.529			36.3	11.182
3220	3.431			36.4	11.089
645	9.267			39.5	10.344
624	9.512			35.5	9.433
619	7.401			36.5	11.454
628	7.566			35.8	9.9
826	7.563			35.7	10.359
812	-4.433			36.4	10.673
611	7.716			36.3	10.197
624	9.239			36.3	10.615
885	8.574			36.3	8.487
795	3.871			35.5	11.756
796	7.896			36.5	11.832
608	9.385			66.8	6.221
948	10.922			68.9	10.242
606	7.668			67	6.647
650	7.194			65.8	-0.379
639	7			68	2.387
631	7.085			67.2	7.435
803	7.737			68.1	8.045
884	8.818			67.1	10.5
996	8.322			67.8	13.882
2511	-6.892			68.9	0.416
819	6.423			65.9	7.682
621	7.975			67.3	8.176
644	8.038			46.4	6.108
778	8.422			47.7	-7.84
650	7.634			48.1	-3.41
796	6.497			49	-7.821
618	6.777			48.7	-0.151
629	8.126			51.5	11.091
649	8.558			48	6.485
618	7.877			50.4	10.801
814	7.541			49.4	-12.573
641	9.199			48.5	14.089
635	8.451			49.3	0.015
635	5.157			52.2	11.154
810	7.055			56.8	9.586
637	7.412			63.6	10.403
629	7.452			59.4	12.02
790	7.335			56.5	12.042
623	7.798			57.1	-2.346
640	8.311			58.1	11.952
640	8.214			58.7	4.885
862	6.652			59.7	6.194
810	6.85			59	-2.317
783	8.76			59.9	12.25
639	8.27			59.8	-10.999
795	6.337			58.3	8.515
646	9.174			61.1	10.265
611	7.764			56.9	5.9
618	7.986			58.7	12.336
957	7.448			56.7	8.306
762	7.113			59.2	4.69
792	7.397			65	9.713
615	7.807			59.4	7.059
759	9.401			61.5	9.222
593	6.572			60.4	13.493
618	7.924			61	8.626
615	7.494			60.2	10.446
822	7.593			71	5.641
759	7.883			59.8	8.359
1972	-3.335			59.9	12.756
662	8.272			62.3	0.214
842	8.373			62.5	0.731
620	6.282			62.2	12.979
614	7.458			64.7	3.73
621	7.444			63.2	1.195
889	9.024			47.3	8.204
629	6.684			47.6	12.627
789	6.561			47.4	8.475
802	7.477			49.9	11.095
804	8.526			55.1	4.402
782	6.877			47.8	9.037
615	7.018			47	6.379
812	9.822			46.6	3.398
622	8.692			45.9	7.89
615	7.288			46.8	10.32
801	8.078			284.3	-2.098
605	6.915			44.8	11.6
619	7.996			50.5	6.213
815	6.823			46.1	9.949
806	7.854			46.3	6.706
822	9.544			48	12.382
862	7.988			45.8	6.177
613	6.821			45.7	9.647
798	7.89			49.3	8.858
794	8.037			46.8	3.736
609	6.655			48.2	9.895
597	6.859			47.1	9.019
583	6.485			45.8	5.243
725	5.39			43.1	10.194
609	6.46			47.1	7.809
620	7.414			45.1	6.192
796	8.054			45.8	9.085
573	7.212			45.5	7.56
591	5.876			47.5	7.119
830	9.051			46.8	9.917
900	8.87			54.7	12.101
653	7.764			51.2	13.139
600	8.587			61.8	8.752
824	7.98			49.2	12.174
783	7.873			50.8	10.804
878	7.93			47.3	11.604
589	6.29			50	9.808
616	7.537			47.6	9.812
617	6.815			58.2	13.135
802	7.459			45.4	11.49
792	7.028			58.4	13.2
828	7.961			46.8	11.552
804	8.622			49	9.28
759	6.81			45	15.106
582	5.75			46.7	11.649
2117	2.775			46.8	12.024
615	6.806			47.1	12.425
819	10.077			45.8	10.058
597	6.36			52.5	10.363
792	7.697			47.9	10.384
620	7.527			59	13.786
613	8.274			58.8	13.129
598	5.926			48.8	11.915
581	6.18			46.1	9.615
794	8.766			58.1	12.464
766	8.572			46.9	8.013
821	9.078			57	13.216
819	9.391			47.6	10.55
802	7.923			46.6	10.195
769	6.828			46.7	12.322
788	5.899			49	8.896
592	7.05			48.4	6.378
605	7.73			49.4	11.677
593	7.89			47.1	11.118
832	6.69			46.3	12.086
616	7.391			44.9	13.738
591	7.973			47.3	11.318
622	7.675			59.1	12.055
848	7.656			50.7	13.167
624	7.41			46.4	8.556
618	7.129			49.5	10.504
646	8.646			47.7	10.392
794	7.281			52.8	9.259
804	9.467			49.8	13.256
797	7.638			45.6	10.587
619	7.872			55.8	14.251
791	8.879			47.6	10.57
894	12.1			41	11.236
599	7.296			58.2	15.769
799	9.38			57.5	13.461
610	7.052			50.2	8.705
818	7.952			44.9	14.08
589	7.477			57.7	16.477
813	10.071			56.5	13.924
618	8.02			46.5	10.008
809	7.809			55.6	11.729
911	9.879			42.8	11.681
803	7.092			45.7	12.1
602	7.426			42.9	13.576
802	6.823			41.5	12.388
853	9.481			45.4	12.614
606	7.361			44	10.146
870	10.427			43	11.138
667	8.265			49.1	11.929
613	7.308			44.2	0.567
793	6.213			42	14.925
607	8.607			41.4	11.668
614	8.573			43.2	12.299
2202	5.521			40	12.37
2149	6.293			45	13.723
2091	4.73			40.4	13.632
2069	6.085			41.2	9.113
1927	-0.991			176	7.304
2200	7.866			176	7.251
2206	1.085			175	7.475
2079	4.578			177	6.033
2178	7.465			178	7.362
2420	2.676			179	6.657
2199	-1.754			175	6.609
2746	-3.269			175	6.312
2075	0.635			174	6.892
2077	6.199			178	6.526
2462	4.206			277.7	2.121
2283	8.228			283.5	2.07
2514	2.699			279.7	3.538
2087	5			284.1	3.625
1948	1.417			281.6	3.373
2100	2.222			283.2	3.35
2205	-6.781			278.6	3.245
2343	2.966			281.6	1.314
2319	3.838			277.6	2.763
2055	4.595			277.1	1.182
2080	0.736			310	-4.003
2432	1.539			324.9	-5.004
1905	-0.294			305.8	1.928
2006	2.525			313.9	2.624
2443	4.414			302.6	3.103
1857	-3.183			296.2	3.106
2105	-0.845			298.6	3.771
2028	-16.39			307.6	3.741
2096	-13.962			312.7	-3.34
2013	4.75			305.8	3.677
2090	5.928			311	1.996
2220	0.881			303.7	-5.495
2077	3.469			323.3	0.798
2110	-8.598			309.3	2.083
2021	4.715			334.5	-7.11
2020	3.288			317.7	-2.558
2108	-12.914			327.2	-8.361
2538	-0.855			333.4	-4.815
2064	-5.107			315.2	-3.633
2105	3.478			293.5	-3.278
2527	2.452			273.4	-0.819
2087	-3.362			328.2	-3.32
2129	-2.403			279.6	2.522
1809	-3.294			294.3	-7.996
2561	-4.763			276.4	0.299
2322	2.003			286.8	-8.58
2392	2.128			324.2	-3.178
2513	3.45			283.7	2.539
1969	-0.911			288.9	-4.567
1825	-5.528			343.3	0.283
608	-11.581			341.8	1.764
579	-3.019			342.2	-2.294
598	-7.465			324.2	-18.172
1905	0.329			332.7	-20.075
2111	7.174			318.2	0.258
633	-3.004			460	-6.377
2722	2.843			1596	2.895
612	-3.081			729	1.253
603	-4.472			644	0.377
2106	5.019			468	-9.361
640	-11.077			1304	-8.416
1830	1.419			748	0.798
2173	7.189			456	-6.237
2016	3.177			1039	-4.903
2080	4.129			445	-6.762
2085	4.635			952	-10.455
644	-1.856			1213	-3.501
2056	4.595			477	-6.573
1907	-0.111			952	-22.173
2128	4.644			627	-0.426
2374	-5.755			1407	6.322
662	6.686			820	0.566
593	-2.588			752	2.893
624	-2.72			1235	5.61
612	-4.285			2610	-1.978
611	-3.946			3280	0.285
637	-3.502			2566	-1.019
613	5.035			1193	5.686
2193	4.526			1716	-16.799
637	-3.135			605	-4.492
617	-3.23			644	-8.782
591	-3.543			642	5.216
634	3.352			1666	0.031
2078	2.69			1799	-1.917
714	12.78			1130	4.259
591	-3.768			615	-3.239
606	0.594			609	-1.691
618	-3.956			646	11.296
616	10.042			603	-3.333
598	-1.484			1498	6.725
1970	2.051			1326	4.02
2221	-0.477			659	8.665
2289	8.079			1187	3.74
2515	1.129			1208	2.774
2087	2.285			1382	-1.506
610	-7.169			566	-2.803
1955	-0.098			2025	2.445
1795	-2.172			2750	-1.484
2261	-0.177			2058	3.328
2454	1.789			1058	5.706
661	-4.175			1121	1.316
616	5.422			950	-17.748
2166	5.815			2124	0.704
614	-4.296			1905	-0.153
2031	4.79			638	-3.214
610	-4.311			621	1.189
1789	-2.997			2049	2.203
2218	1.725			599	-13.044
1923	-4.181			1738	-0.644
2210	-1.907			457	-15.078
1940	-0.728			645	-11.097
2130	3.977			666	4.439
2066	3.209			546	-6.289
1819	1.309			621	-9.073
2450	3.236			636	-7.569
2032	1.66			436	-11.827
616	-12.544			789	8.28
2088	3.752			1746	-14.912
2343	3.782			538	1.242
2194	1.23			519	5.297
2516	4.828			1892	-12.887
624	-11.529			2146	1.318
1947	1.113			1403	3.297
2055	1.777			1064	-0.012
1934	2.202			748	7.987
1986	3.196			2190	-0.325
2456	2.828			590	-6.914
2021	4.51			2840	-2.767
2264	7.78			516	-4.36
2422	-0.558			632	2.067
2542	-7.07			541	-2.433
2042	4.307			1348	0.41
2487	-1.82			584	6.197
2262	-6.986			1634	-14.219
2197	0.925			1708	1.099
2120	5.166			1844	-2.637
671	7.36			1282	5.667
2228	7.109			659	1.974
2048	4.732			939	9.216
2192	-1.947			1208	2.178
2052	4.086			682	-12.983
1960	1.039			2066	-17.204
2497	-2.602			1544	1.308
2259	-9.183			619	-8.532
2389	2.209			631	-2.624
1847	3.086			2130	-6.378
1908	-2.34			1120	0.9
2448	3.4			1708	-13.749
633	10.315			637	-2.548
607	6.336			1800	-3.232
2164	6.453			540	-9.059
1819	-1.142			2025	0.636
590	3.537			859	-0.96
601	1.942			2592	-11.045
2215	6.626			609	-5.489
2119	-1.295			1755	1.321
588	5.718			1093	3.237
582	6.377			1251	-2.125
695	11.336			1699	-1.793
622	9.435			1188	-5.419
640	-0.539			1106	-0.786
632	8.157			389	-9.734
602	9.694			1220	-3.726
640	8.939			1182	-3.799
685	10.448			975	2.863
650	6.934			953	0.412
619	6.41			953	0.879
616	-12.54			944	-0.8
690	11.787			1123	-5.942
608	9.373			1123	-4.314
627	10.2			1018	4.077
655	0.511			1195	-11.399
2052	2.472			964	-0.224
699	11.222			1112	0.421
638	4.554			1180	-3.88
613	-13.597			1259	-2.975
2229	1.131			953	3.28
685	7.887			1804	-3.738
583	0.598			1666	-3.05
671	11.293			1203	-1.74
2610	1.508			1824	-1.402
591	3.731			1162	3.094
593	8.221			1117	1.072
583	7.987			982	-6.955
617	-12.284			972	1.1
627	6.701			1122	-6.465
641	0.502			1027	1.823
773	14.061			1022	-7.421
630	7.57			1048	5.216
633	-7.032			986	-0.29
638	7.436			1381	1.71
629	10.714			1448	-6.595
633	10.314			1041	2.494
2084	3.125			1035	4.254
643	-8.977			933	1.005
2068	3.28			1114	-12.525
612	-13.906			997	-9.712
2169	6.044			1817	0.834
2152	0.792			1065	1.205
2087	3.163			1081	4.216
2114	6.646			1151	-2.621
2198	6.945			1042	1.333
2227	6.498			1228	-2.539
609	-13.667			1220	-0.903
619	-13.152			491	-2.209
2046	3.304			383	-10.459
2114	5.363			345	-9.457
2114	5.363			1025	7.636
2039	3.117			1068	2.352
2012	1.237			1079	8.304
2028	4.539			591	-2.761
2054	3.378			2053	-9.455
2036	2.212			1319	3.177
2054	3.085			2079	3.017
2054	1.798			1722	-2.193
2068	2.791			1285	-1.505
2180	-1.295			1129	7.956
2118	4.413			660	-1.938
2044	2.846			1056	5.685
2095	2.794			529	1.942
2076	3.241			382	-5.743
2117	4.454			1983	-1.059
2039	3.437			1137	7.982
574	5.071			1199	-2.28
552	3.114			501	-2.367
558	2.961			1770	-5.049
592	5.602			1212	-3.422
546	2.916			604	-6.545
543	3.119			453	-9.679
550	3.196			666	-7.034
567	4.131			790	5.363
574	3.008			981	-6.556
599	6.639			884	-2.687
584	3.125			1387	8.41
556	4.012			1044	7.585
581	3.149			689	-3.409
579	3.848			491	-0.705
563	3.084			1824	-6.322
570	4.967			571	0.209
596	2.996			419	-5.183
590	3.194			411	-10.161
621	8.674			754	1.66
579	5.048			627	-1.572
564	4.075			1737	-24.139
563	1.535			1912	-11.516
2037	4.336			457	-3.412
561	3.782			413	-4.615
552	2.961			1026	6.328
556	3.4			408	-3.001
586	2.382			420	-5.072
557	3.39			1863	-3.553
555	4.298			1183	10.764
554	3.532			464	-0.955
560	-6.312			1866	-0.447
2121	6.058			1311	7.027
585	5.957			587	-0.667
580	3.089			656	2.782
540	3.528			2016	1.484
556	2.978			650	-3.798
548	2.299			1196	-4.954
544	2.324			651	-2.254
543	2.878			1152	5.226
3462	-0.772			1022	6.001
3153	-1.652			652	3.382
3408	-2.926			406	-4.656
3219	1.425			1537	7.203
3506	1.289			1929	-2.553
3202	-4.29			1355	7.991
3086	-2.562			1443	8.799
3418	-2.928			941	1.348
3280	-6.666			539	-1.657
1831	-30.55			2579	-7.222
3019	-3.171			1212	11.477
3113	-1.475			437	-0.815
3202	-2.478			409	-2.149
3135	-6.29			970	0.737
3301	-0.763			1101	4.242
3151	-2.277			1833	-5.171
3098	-0.766			496	-6.423
2978	-6.857			487	-32.781
3534	-0.819			834	-4.802
[truncated: 10,236 more rows]
